# Supplementary material for: Application of The Robotic Seal PARO, A Neurological Biofeedback Medical Device, to Elderly Persons with Dementia at Home: An Analysis From Seven Cases
Source: Research Square preprint supplement (doi:10.21203/rs.3.rs-137560/v1), 2021-01-14
Supplement: Supplementary file 1 [file ab199a2fb79b1a37f69674f1.pdf]

## Supplementary 1. Semi-structured Interview Guide

Case Number: \_\_\_\_\_

### I. Introduction

1. Objective of the Interview:

To know the experience and perspective of the users' caregiver after using PARO

2. Duration: 30-45 minutes

### II. Verbal Consent

“Will you have time to spare for this interview?” (Y/N)

### III. Key Questions

1. Can you tell me how was [subject's] reaction to PARO?
  - What behaviours did you notice with [subject] when using PARO?
  - *Probing statement:* You said \_\_\_\_\_, can you tell me more about it?
2. As a caregiver, how do you feel about using PARO?
  - *Probing statement:* You said \_\_\_\_\_, can you tell me more about it?
3. Based on this experience, what are your thoughts and comments about using PARO?
  - *Probing statement:* You said \_\_\_\_\_, can you tell me more about it?
